# Supplementary material for: Spatial spread of the West Africa Ebola epidemic
Source: PubMed Central journal article supplement (PMC5108957; doi:10.1098/rsos.160294), 2016-08-03
Supplement: rsos160294supp1.pdf [file rsos160294supp1.pdf]

Figure S1:

Number of confirmed and suspected cases of Ebola up to 30 September 2014 in districts of Guinea (black), Liberia (red) and Sierra Leone (green), as a function of district population size.

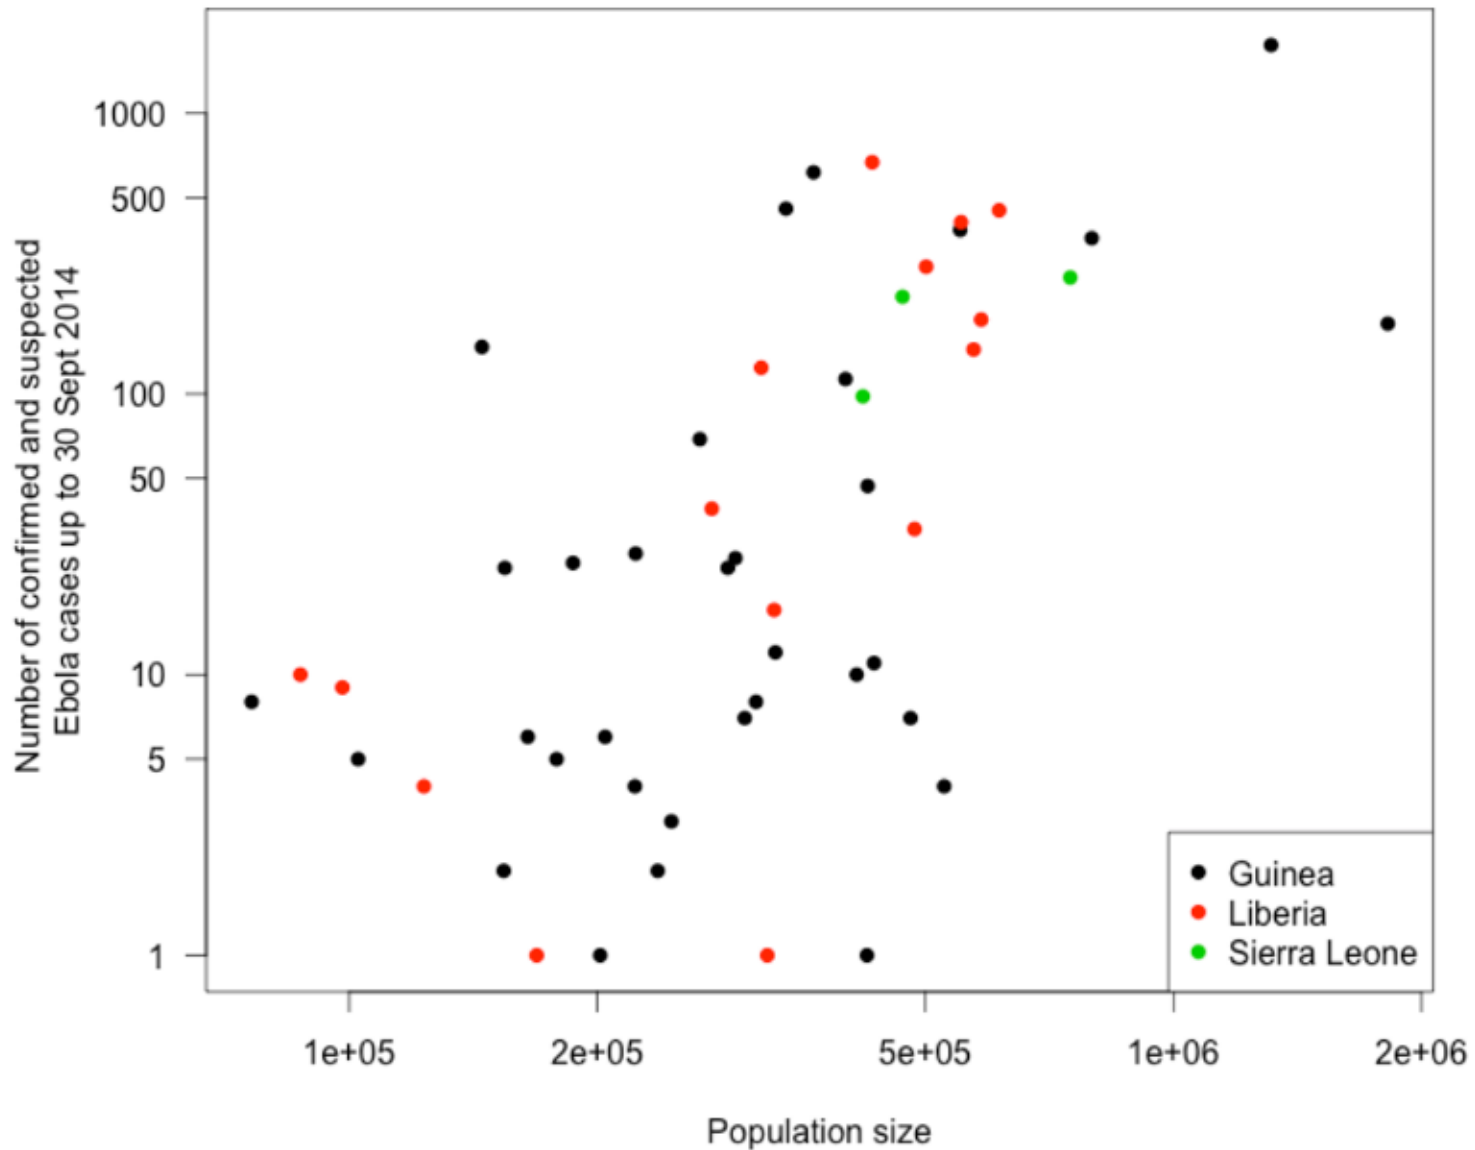

Figure S2:

Micro-scale fit of competing models. Predicted day of infection for infected administrative units based on each of the models (excluding best fit model, shown in Fig 2). The predicted day of infection for nodes based on simulations from April 24th. For each node, the 95% prediction interval is in light gray with the interquartile range specified as dark gray and the median infection as a break. Dots represent the observed day of infection for each node. Infection locations used in fitting are to the left of the dotted line and infection subsequent to October 1st are to the right of the dotted line.





Figure S3:

Coverage vs. correlation of unit-infection dates. The correlation between the actual infection date and simulated median date of infection for a representative subset of compared models is plotted versus the coverage for the same model. Coverage is defined as percent of actual infection dates occurring in the 95% prediction intervals (Fig S2). The best-fit and other gravity models have the best combination of accuracy and precision by these measures.

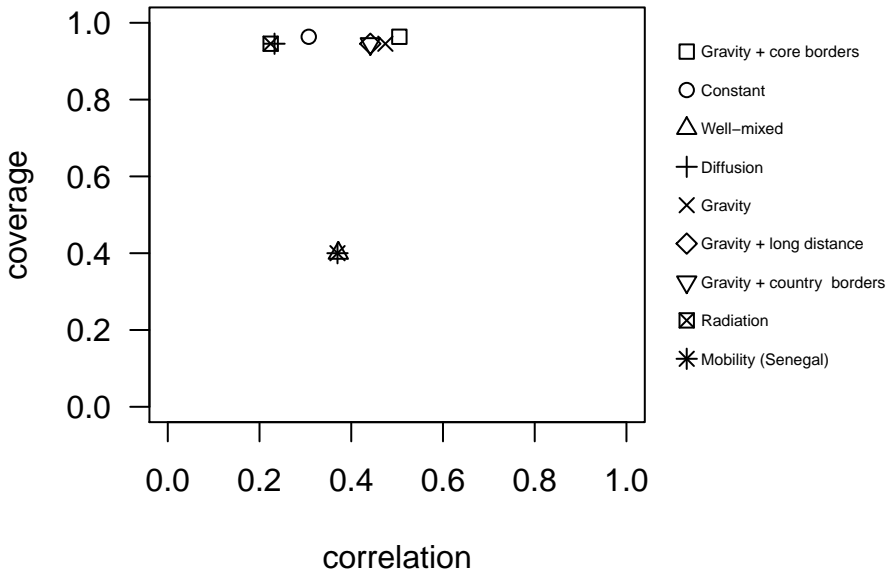

Figure S4:

Macro-scale spread statistics of gravity + core border model. Orange shading represents simulated spread from April 24th to Oct 1st, 2014 and unshaded represents forecasts obtained by forward simulations until June 30th 2015. Simulations forward were based on epidemic transmission remaining unchanged from the fitting period and therefore does not account for the realized success of control. Dots are observed data, solid lines are median values, and dotted lines/shaded areas represent 95% prediction intervals. a) The number of newly infected administrative units is consistent with observation and continues to accelerate if spread continues uncontrolled. The maximum b) and median c) distance from Guéckédou; the maximum distance increased faster than predicted due to early spread to Nigeria. d) The convex hull of infection area is the total area within the minimum convex polygon of infected unit centroids.



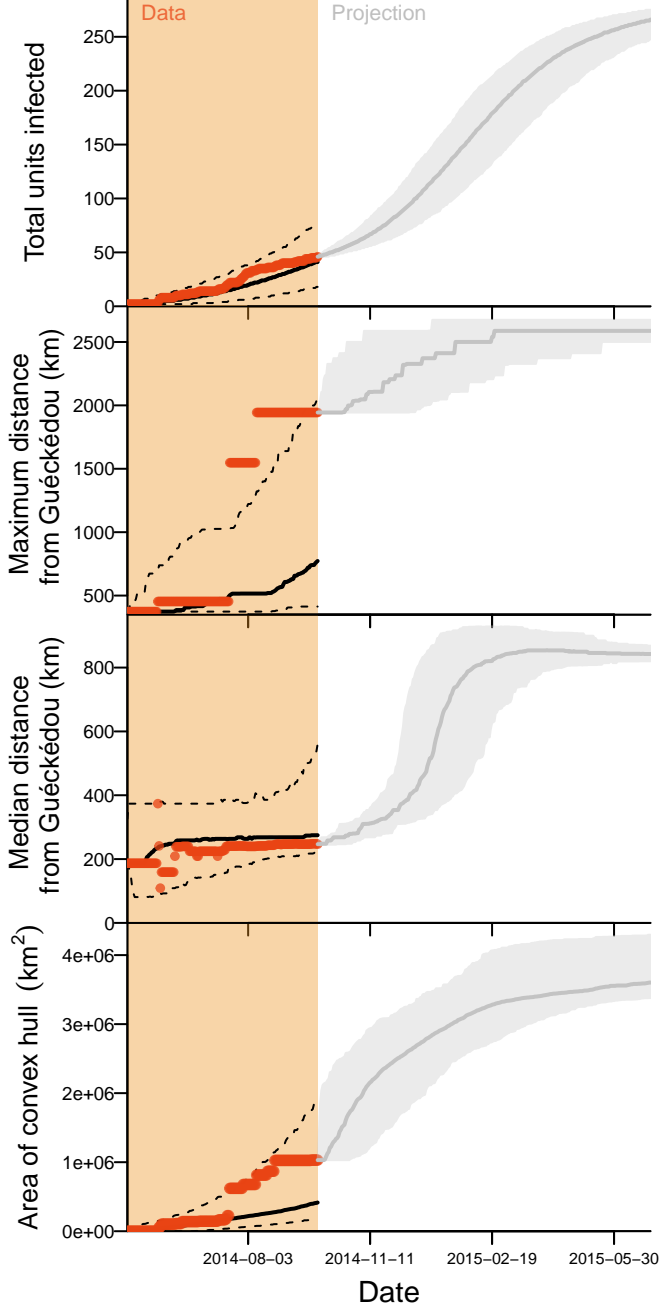

**Gravity + core borders**

Figure S5:

Predicted day of infection for infected administrative units based on the best fit model. Predicted intervals for the counties without observed infections are included for assessment of lack of spread. The predicted day of infection for nodes is based on simulations from April 24<sup>th</sup>. For each node, the 95% prediction interval is in light blue with the interquartile range specified as dark blue and the median infection as a break. Dots represent the observed day of infection for each node colored by country. Infection locations used in fitting are to the left of the dotted line and infection subsequent to Oct 1 are to the right of the first dotted line. After the second dotted line are the counties in the dataset that were not infected. Most have median infection dates much later than predicted for the infected counties and the actual infections also fall below the interquartile range of these counties. Given that interventions and changes in behavior began to slow the outbreak in late 2015 it is unreasonable to expect many additional infections after this point. However, it is interesting that much of the remainder of uninfected West African locations have similar, wide ranges of the predicted date of infection, this illustrates the importance of stochasticity in determining the realized path of spread. We have further illustrated the difference between core-countries and the rest of the region by coloring core-countries with a lighter color.



Supplementary Information Table 1: Infection data and sources.

The following details the sources of information used to determine the initial dates of infection for each administrative unit used in model fitting. Information was accumulated and updated as the epidemic progressed and dates used for fitting were finalized Oct 10<sup>th</sup>, 2014. Recently WHO has released new data showing confirmed infections in counties earlier (and in a few cases later) than the data below. These new data also differed in being aggregated weekly. We used these recent patient databases to fit the same models to weekly data and found qualitatively similar results with the same best fit model and the same support for gravity models overall with AIC.

| Country      | County        | Date      | Official Confirmation                                                       | Additional Source                             |
|--------------|---------------|-----------|-----------------------------------------------------------------------------|-----------------------------------------------|
| Sierra Leone | Kailahun      | 5/24/2014 | WHO Outbreak News <sup>1</sup> , WHO Essay <sup>2</sup>                     |                                               |
| Sierra Leone | Kenema        | 6/17/2014 | 24 June GoSL SitRep <sup>3</sup>                                            | Media <sup>4</sup>                            |
| Sierra Leone | Kono          | 7/29/2014 | NGO (Wellbody Alliance) <sup>5</sup>                                        |                                               |
| Sierra Leone | Bombali       | 7/20/2014 | 30 July IFRC-SL SitRep <sup>6</sup>                                         | Media <sup>7,8</sup>                          |
| Sierra Leone | Kambia        | 6/5/2014  | 6 June GoSL SitRep <sup>9</sup>                                             |                                               |
| Sierra Leone | Port Loko     | 6/6/2014  | 11 June GoSL SitRep <sup>10</sup>                                           | Media <sup>11</sup>                           |
| Sierra Leone | Tonkolili     | 8/3/2014  | 4 August GoSL SitRep <sup>12</sup>                                          |                                               |
| Sierra Leone | Bo            | 6/23/2014 | 24 June GoSL SitRep <sup>3</sup>                                            |                                               |
| Sierra Leone | Bonthe        | 7/17/2014 | 20 July US Embassy <sup>13</sup>                                            | Blog (text of SL Facebook post) <sup>14</sup> |
| Sierra Leone | Moyamba       | 7/29/2014 | 4 August GoSL SitRep <sup>12</sup>                                          | Media <sup>15</sup>                           |
| Sierra Leone | Pujehun       | 8/1/2014  | 4 August GoSL SitRep <sup>12</sup>                                          | Media <sup>16</sup>                           |
| Sierra Leone | Western Rural | 8/7/2014  | 8 August GoSL SitRep <sup>17</sup>                                          |                                               |
| Sierra Leone | Western Urban | 7/11/2014 | 20 July US Embassy <sup>13</sup>                                            | Media <sup>18</sup>                           |
| Guinea       | Boffa         | 5/22/2014 | 6 June GoG SitRep <sup>19</sup>                                             |                                               |
| Guinea       | Conakry       | 4/26/2014 |                                                                             |                                               |
| Guinea       | Kissidougou   | 9/14/2014 | 16 September GoG SitRep <sup>20</sup>                                       |                                               |
| Guinea       | Krouan        | 8/31/2014 | 31 August GoG SitRep <sup>21</sup>                                          |                                               |
| Guinea       | Kouroussa     | 5/25/2014 | 5 June GoG SitRep <sup>19</sup>                                             |                                               |
| Guinea       | Siguir        | 7/18/2014 | 22 July GoG SitRep <sup>22</sup>                                            |                                               |
| Guinea       | Coyah         | 9/1/2014  | 2 September GoG SitRep <sup>23</sup>                                        |                                               |
| Guinea       | Dubrka        | 8/13/2014 | 14 August GoG SitRep <sup>21</sup>                                          |                                               |
| Guinea       | Forcariah     | 8/27/2014 | 29 August GoG SitRep <sup>24</sup>                                          |                                               |
| Guinea       | Kindia        | 9/20/2014 | 20 September GoG SitRep <sup>25</sup>                                       |                                               |
| Guinea       | Tliml         | 5/23/2014 | WHO Outbreak News <sup>26</sup> , 27<br>May GoG SitRep <sup>27</sup>        |                                               |
| Guinea       | Dalaba        | 9/11/2014 | 12 September GoG SitRep <sup>28</sup>                                       |                                               |
| Guinea       | Pita          | 7/27/2014 | 4 August GoG SitRep <sup>29</sup>                                           | Media <sup>30</sup>                           |
| Guinea       | Beyla         | 9/20/2014 | 25 September GoG SitRep <sup>31</sup>                                       |                                               |
| Guinea       | Guckdou       | 4/26/2014 |                                                                             |                                               |
| Guinea       | Lola          | 9/30/2014 | 1 October GoG SitRep <sup>32</sup>                                          |                                               |
| Guinea       | Macenta       | 5/23/2014 | WHO Outbreak News <sup>26</sup> , 27<br>May GoG SitRep <sup>27</sup>        |                                               |
| Guinea       | Nzrkor        | 8/2/2014  | 4 August GoG SitRep <sup>29</sup>                                           |                                               |
| Guinea       | Yamou         | 8/7/2014  | 7 August GoG SitRep <sup>33</sup>                                           |                                               |
| Liberia      | Nimba         | 7/17/2014 | 20 July GoL SitRep <sup>34</sup> , 16 July<br>UNICEF SitRep <sup>35</sup>   |                                               |
| Liberia      | River Cess    | 7/31/2014 | 31 July GoL SitRep <sup>36</sup> , 15<br>August UNICEF SitRep <sup>37</sup> |                                               |
| Liberia      | River Gee     | 9/25/2014 | 25 September GoL SitRep <sup>38</sup>                                       |                                               |
| Liberia      | Sinoe         | 8/20/2014 | 20 August GoL SitRep <sup>39</sup>                                          |                                               |
| Liberia      | Bomi          | 7/10/2014 | 10 July GoL SitRep                                                          |                                               |

|         |                  |           |                                                                                                                                                     |                        |
|---------|------------------|-----------|-----------------------------------------------------------------------------------------------------------------------------------------------------|------------------------|
| Liberia | Bong             | 7/15/2014 | 16 July UNICEF SitRep <sup>35</sup>                                                                                                                 |                        |
| Liberia | Grand Cape Mount | 7/30/2014 | 31 July GoL SitRep <sup>36</sup> , 2 August GoL SitRep <sup>40</sup>                                                                                |                        |
| Liberia | Grand Bassa      | 8/2/2014  | 2 August GoL SitRep <sup>40</sup><br>Probable, WHO Patient-level: there are earlier cases <sup>41</sup> , GoL Ministry of Information <sup>42</sup> | Media <sup>43,44</sup> |
| Liberia | Lofa             | 5/23/2014 | 6 June GoL SitRep <sup>45</sup>                                                                                                                     |                        |
| Liberia | Margibi          | 6/25/2014 | 25 June GoL SitRep <sup>46</sup>                                                                                                                    |                        |
| Liberia | Montserrado      | 6/11/2014 | 11 June GoL SitRep <sup>47</sup> , 12 June GoL SitRep <sup>48</sup>                                                                                 |                        |
| Nigeria | Lagos            | 7/20/2014 | WHO Outbreak News <sup>49</sup>                                                                                                                     |                        |
| Nigeria | Rivers           | 8/11/2014 | WHO Situation Assessment <sup>50</sup>                                                                                                              |                        |
| Senegal | Dakar            | 8/26/2014 | WHO Outbreak News <sup>51</sup>                                                                                                                     |                        |

1. Ebola virus disease, West Africa (Update of 26 May 2014) - WHO | Regional Office for Africa. *WHO | Regional Office for Africa* (2014). at <<http://www.afro.who.int/en/clusters-a-programmes/dpc/epidemic-a-pandemic-alert-and-response/outbreak-news/4143-ebola-virus-disease-west-africa-26-may-2014.html>>
2. WHO | Sierra Leone: a traditional healer and a funeral. *WHO* (2014). at <<http://who.int/csr/disease/ebola/ebola-6-months/sierra-leone/en/>>
3. *EBOLA VIRUS DISEASE Sierra Leone Situation Report (SitRep) – 24 June 2014*. (Government of Sierra Leone Ministry of Health and Sanitation, 2014). at <<http://www.humanitarianresponse.info/operations/sierra-leone/document/ebola-virus-disease-sierra-leone-situation-report-sitrep-%E2%80%9324-june>>
4. Moriba, S. B. Sierra Leone News: Kenema Matron calls for support to tackle Ebola « Awoko Newspaper. (2014). at <<http://awoko.org/2014/06/19/sierra-leone-news-kenema-matron-calls-for-support-to-tackle-ebola/>>
5. First confirmed case of Ebola in Kono. *Wellbody Alliance* (2014). at <<http://wellbodyalliance.org/blog/2014/jul/29/first-confirmed-case-ebola-kono/>>
6. Emergency appeal operations update Sierra Leone: Ebola Virus Disease. *Appeals - IFRC* (2014). at <<http://www.ifrc.org/en/publications-and-reports/appeals/?ac=&at=0&c=213&co=SP161SL&dt=1&f=&p=0&re=&sort=Date&t=&ti=&zo=>>>
7. Augustine Samba. As only Kono, Tonkolili, Koinadugu & Moyamba are Free, Bombali Confirms Ebola cases in Makari – Gbanti. *Awareness Times: Sierra Leone News & Information* (2014). at <[http://news.sl/drwebsite/publish/article\\_200525859.shtml](http://news.sl/drwebsite/publish/article_200525859.shtml)>
8. Mohamed Kabba. Bombali Ebola: Five Dead, 6 more Suspects Confirmed. *Awoko Newspaper* (2014). at <<http://awoko.org/2014/07/31/sierra-leone-news-bombali-ebola-five-dead-6-more-suspects-confirmed/>>
9. *EBOLA VIRUS DISEASE Sierra Leone Situation Report (SitRep) – 6 June 2014*. (Government of Sierra Leone Ministry of Health and Sanitation, 2014).
10. *EBOLA VIRUS DISEASE Sierra Leone Situation Report (SitRep) – 11 June 2014*. (Government of Sierra Leone Ministry of Health and Sanitation, 2014).
11. Hassan Bruz. EBOLA Travels from the east to the north- Where next? *My Sierra Leone* (2014). at <[http://mysierraleoneonline.com/sl\\_portal/site/news/detail/2549](http://mysierraleoneonline.com/sl_portal/site/news/detail/2549)>

12. *EBOLA VIRUS DISEASE Sierra Leone Situation Report (SitRep) – 04 August 2014*. (Government of Sierra Leone Ministry of Health and Sanitation, 2014). at <http://www.humanitarianresponse.info/system/files/documents/files/Sierra%20Leone%20Ebola%20sitrep%204%20August%202014.pdf>
13. As of July 20, there are 405 confirmed cases of Ebola Virus Disease in Sierra Leone. *Facebook/ U.S. Department of State: Embassy Freetown, Sierra Leone* (2014). at <https://www.facebook.com/sierraleone.usembassy/posts/10152543703407866>
14. H5N1: Sierra Leone: Ebola update, July 17. (2014). at <http://crofsblogs.typepad.com/h5n1/2014/07/sierra-leone-ebola-update-july-17.html>
15. Koroma, N. A. Ebola Kills Four in Bonthe, Moyamba. *Premier Media Sierra Leone* (2014). at <http://www.premiermedia.sl/content/ebola-kills-four-bonthe-moyamba>
16. Abibatu Kamara. Ebola reaches Pujehun. *Awoko Newspaper* (2014). at <http://awoko.org/2014/08/05/sierra-leone-news-ebola-reaches-pujehun/>
17. *EBOLA VIRUS DISEASE Sierra Leone Situation Report (SitRep) – 08 August 2014*. (Government of Sierra Leone Ministry of Health and Sanitation, 2014). at <http://www.humanitarianresponse.info/system/files/documents/files/Sierra%20Leone%20Ebola%20sitrep%208%20August%202014.pdf><http://www.humanitarianresponse.info/system/files/documents/files/Sierra%20Leone%20Ebola%20sitrep%2008%20August%202014.pdf>
18. Silas Gbandia. Ebola Spreads to Sierra Leone Capital of Freetown as Deaths Rise. *Bloomberg News* (2014). at <http://www.bloomberg.com/news/2014-07-12/ebola-spreads-to-sierra-leone-capital-of-freetown-as-deaths-rise.html>
19. *Rapport de la Situation Epidémiologique Guinée, Epidémie de la Fièvre Hémorragique Ebola Situation au 05 juin 2014*. (Government of Guinea, 2014). at [http://www.humanitarianresponse.info/system/files/documents/files/Guinea\\_Ebola\\_Sit\\_Rep\\_n%C2%B0%2055%20du%2005\\_juin\\_2014.pdf](http://www.humanitarianresponse.info/system/files/documents/files/Guinea_Ebola_Sit_Rep_n%C2%B0%2055%20du%2005_juin_2014.pdf)
20. *Rapport de la Situation Epidémiologique Guinée, Epidémie de la Fièvre Hémorragique Ebola Situation au 16 Septembre 2014 à 18h00*. (Government of Guinea, 2014). at

<[http://www.humanitarianresponse.info/system/files/documents/files/GUINEA\\_EBOLA\\_SITREP%20N%20154%20DU%2017%20SEPTEMBRE\\_2014.docx%20VF.pdf](http://www.humanitarianresponse.info/system/files/documents/files/GUINEA_EBOLA_SITREP%20N%20154%20DU%2017%20SEPTEMBRE_2014.docx%20VF.pdf)>

21. *Rapport de la Situation Epidémiologique Guinée, Epidémie de la Fièvre Hémorragique Ebola Situation au 31 août 2014 à 18h00.* (Government of Guinea, 2014). at

<[http://www.humanitarianresponse.info/system/files/documents/files/GUINEA\\_EBOLA\\_SITREP%20N%20138%20DU%2001%20SEPTEMBRE\\_2014%20V3.pdf](http://www.humanitarianresponse.info/system/files/documents/files/GUINEA_EBOLA_SITREP%20N%20138%20DU%2001%20SEPTEMBRE_2014%20V3.pdf)>

22. *Rapport de la Situation Epidémiologique Guinée, Epidémie de la Fièvre Hémorragique Ebola Situation au 22 juillet 2014 à 18h00.* (Government of Guinea, 2014). at

<[http://www.humanitarianresponse.info/system/files/documents/files/Guinea\\_Ebola\\_Sit\\_Rep\\_n98%20du%2023%20juillet\\_2014.pdf](http://www.humanitarianresponse.info/system/files/documents/files/Guinea_Ebola_Sit_Rep_n98%20du%2023%20juillet_2014.pdf)>

23. *Rapport de la Situation Epidémiologique Guinée, Epidémie de la Fièvre Hémorragique Ebola Situation au 02 Septembre 2014 à 18h00.* (Government of Guinea, 2014). at

<[http://www.humanitarianresponse.info/system/files/documents/files/GUINEA\\_EBOLA\\_SITREP%20N%20139%20DU%2002%20SEPTEMBRE\\_2014.pdf](http://www.humanitarianresponse.info/system/files/documents/files/GUINEA_EBOLA_SITREP%20N%20139%20DU%2002%20SEPTEMBRE_2014.pdf)>

24. *Rapport de la Situation Epidémiologique Guinée, Epidémie de la Fièvre Hémorragique Ebola Situation au 29 août 2014 à 18h00.* (Government of Guinea, 2014). at

<[http://www.humanitarianresponse.info/system/files/documents/files/GUINEA\\_EBOLA\\_SITREP%20N%20136%20DU%2030%20AOUT\\_2014.VF\\_.pdf](http://www.humanitarianresponse.info/system/files/documents/files/GUINEA_EBOLA_SITREP%20N%20136%20DU%2030%20AOUT_2014.VF_.pdf)>

25. *Rapport de la Situation Epidémiologique Guinée, Epidémie de la Fièvre Hémorragique Ebola Situation au 20 Septembre 2014 à 18h00.* (Government of Guinea, 2014). at

<[http://www.humanitarianresponse.info/system/files/documents/files/GUINEA\\_EBOLA\\_SITREP%20N%20158%20DU%2021%20SEPTEMBRE\\_2014.docx%20VF.pdf](http://www.humanitarianresponse.info/system/files/documents/files/GUINEA_EBOLA_SITREP%20N%20158%20DU%2021%20SEPTEMBRE_2014.docx%20VF.pdf)>

26. Ebola virus disease, West Africa (Situation as of 23 May 2014). *WHO / Regional Office for Africa* (2014). at

<<http://www.afro.who.int/en/clusters-a-programmes/dpc/epidemic-a-pandemic-alert-and-response/outbreak-news/4141-ebola-virus-disease-west-africa-situation-as-of-23-may-2014.html>>

27. *Rapport de la Situation Epidémiologique, Guinée, Epidémie de la Fièvre Hémorragique Ebola, Situation au 27 mai 2014.* (Government of Guinea, 2014). at



<[http://www.humanitarianresponse.info/system/files/documents/files/Guinea\\_Ebola\\_Sit\\_Rep\\_n%2048%20du%2027\\_mai\\_2014.pdf](http://www.humanitarianresponse.info/system/files/documents/files/Guinea_Ebola_Sit_Rep_n%2048%20du%2027_mai_2014.pdf)>

28. *Rapport de la Situation Epidémiologique Guinée, Epidémie de la Fièvre Hémmorragique Ebola Situation au 12 Septembre 2014 à 18h00.* (Government of Guinea, 2014). at

<[http://www.humanitarianresponse.info/system/files/documents/files/GUINEA\\_EBOLA\\_SITREP%20N%20150%20DU%2013%20SEPTEMBRE\\_2014.VF\\_.pdf](http://www.humanitarianresponse.info/system/files/documents/files/GUINEA_EBOLA_SITREP%20N%20150%20DU%2013%20SEPTEMBRE_2014.VF_.pdf)>

29. *Rapport de la Situation Epidémiologique Guinée, Epidémie de la Fièvre Hémmorragique Ebola Situation au 04 août 2014 à 18h00.* (Government of Guinea, 2014). at

<[http://www.humanitarianresponse.info/system/files/documents/files/GUINEA\\_EBOLA\\_SITREP%20N%20111%20DU%2005%20AOUT\\_2014%20VF.FINALE.PDF](http://www.humanitarianresponse.info/system/files/documents/files/GUINEA_EBOLA_SITREP%20N%20111%20DU%2005%20AOUT_2014%20VF.FINALE.PDF)>

30. Bah, A. Une victime d'Ebola en provenance de la Sierra Leone inhumée à Pita. *GuinéeNews* (2014). at

<<http://guineenews.org/une-victime-debola-en-provenance-de-la-sierra-leone-inhumee-a-pita/>>

31. *Rapport de la Situation Epidémiologique Guinée, Epidémie de la Fièvre Hémmorragique Ebola Situation au 25 Septembre 2014 à 18h00.* (Government of Guinea, 2014). at

<[http://www.humanitarianresponse.info/system/files/documents/files/GUINEA\\_EBOLA\\_SITREP%20N%20163%20DU%2026%20SEPTEMBRE\\_2014%20VF.pdf](http://www.humanitarianresponse.info/system/files/documents/files/GUINEA_EBOLA_SITREP%20N%20163%20DU%2026%20SEPTEMBRE_2014%20VF.pdf)>

32. *Rapport de la Situation Epidémiologique Guinée, Epidémie de la Fièvre Hémmorragique Ebola Situation au 01 Octobre 2014 à 18h00.* (Government of Guinea, 2014). at

<[http://www.humanitarianresponse.info/system/files/documents/files/GUINEA\\_EBOLA\\_SITREP%20N%20169%20DU%2001%20OCTOBRE\\_2014%20VF.pdf](http://www.humanitarianresponse.info/system/files/documents/files/GUINEA_EBOLA_SITREP%20N%20169%20DU%2001%20OCTOBRE_2014%20VF.pdf)>

33. *Rapport de la Situation Epidémiologique Guinée, Epidémie de la Fièvre Hémmorragique Ebola Situation au 07 août 2014 à 18h00.* (Government of Guinea, 2014). at

<[http://www.humanitarianresponse.info/system/files/documents/files/GUINEA\\_EBOLA\\_SITREP%20N%20114%20DU%2008%20AOUT\\_2014%20VF.PDF](http://www.humanitarianresponse.info/system/files/documents/files/GUINEA_EBOLA_SITREP%20N%20114%20DU%2008%20AOUT_2014%20VF.PDF)>

34. *Liberia Ebola SitRep no. 67.* (Ministry of Health and Social Welfare, Republic of Liberia, 2014). at

<<http://www.mohsw.gov.lr/documents/Liberia%20Ebola%20SitRep%2067%20%20July%2020%202014.pdf>>

35. *UNICEF-Liberia Ebola Virus Disease: SitRep #37, 16 July 2014.* (United Nations Children's Fund, 2014). at

<[http://www.unicef.org/appeals/files/UNICEF\\_Liberia\\_SitRep\\_Ebola\\_Viral\\_Disease\\_16\\_July\\_2014.pdf](http://www.unicef.org/appeals/files/UNICEF_Liberia_SitRep_Ebola_Viral_Disease_16_July_2014.pdf)>

36. *Liberia Ebola SitRep no. 77*. (Ministry of Health and Social Welfare, Republic of Liberia, 2014). at  
<<http://www.mohsw.gov.lr/documents/Liberia%20Ebola%20SitRep%2077%20July%2031%202014.pdf>>
37. *UNICEF-Liberia Ebola Virus Disease: SitRep #47 15 August 2014*. (United Nations Children's Fund, 2014). at  
<[http://www.unicef.org/appeals/files/UNICEF\\_Liberia\\_Ebola\\_Viral\\_Disease\\_SitRep47\\_15\\_August\\_2014.pdf](http://www.unicef.org/appeals/files/UNICEF_Liberia_Ebola_Viral_Disease_SitRep47_15_August_2014.pdf)>
38. *Liberia Ebola SitRep no. 133*. (Ministry of Health and Social Welfare, Republic of Liberia, 2014). at  
<<http://www.mohsw.gov.lr/documents/Liberia%20Ebola%20Sit%20Rep%20133%20Sept%2025.%202014%20%282%29.pdf>>
39. *Liberia Ebola SitRep no. 97*. (Ministry of Health and Social Welfare, Republic of Liberia, 2014). at  
<<http://www.mohsw.gov.lr/documents/Liberia%20Ebola%20SitRep%2097%20Aug%2020,%202014.pdf>>
40. *Liberia Ebola SitRep no. 79*. (Ministry of Health and Social Welfare, Republic of Liberia, 2014). at  
<<http://mohsw.gov.lr/documents/Liberia%20Ebola%20SitRep%2079%20Aug%202,%202014.pdf>>
41. Ebola data and statistics. at <<http://apps.who.int/gho/data/view ebola-sitrep ebola-country-LBR-new-conf-prob-districts-20150107-data?lang=en>>
42. Government of the Republic of Liberia (Ministry of Information) - Bassa Task Force Notes Six Confirmed Ebola Deaths. *Government of Liberia: Ministry of Information* (2014). at  
<<http://www.micatliberia.com/index.php/ebola-update/1146-bassa-task-force-notes-six-confirmed-ebola-deaths.html>>
43. Liberia: First Bassa Ebola Case Confirmed. *The New Republic Liberia* (8/5//14). at  
<<http://allafrica.com/stories/201408051284.html>>
44. FrontPageAfrica - Ebola Claims One Life In Grand Bassa, Five Suspected Cases. *Front Page Africa* (2014). at  
<<http://frontpageafricaonline.com/index.php/county-news/2525-ebola-claims-one-life-in-grand-bassa-five-suspected-cases>>
45. *EBOLA VIRUS DISEASE EPIDEMIC IN LIBERIA Situation Report (Sitrep No.26) as at 09:00 Hrs; 6th June, 2014*. (Ministry of Health and Social Welfare, Republic of Liberia, 2014). at  
<<http://www.mohsw.gov.lr/documents/Liberia%20Ebola%20Virus%20Disease%20Situation%20Report-No-%2026%20as%20of%20the%206-06-14.pdf>>

46. *RE-OCCURANCE OF EBOLA VIRUS DISEASE EPIDEMIC IN LIBERIA SINCE THE 29th MAY, 2014:*

*Edition: No. 42. Reporting period: June 25th 2014 as at 21:00 Hours.* (Ministry of Health and Social Welfare, Republic of Liberia, 2014). at <[http://www.mohsw.gov.lr/content\\_display.php?press\\_id=69&sub=press\\_release](http://www.mohsw.gov.lr/content_display.php?press_id=69&sub=press_release)>

47. *SITUATION REPORT EBOLA VIRUS DISEASE EPIDEMIC IN LIBERIA Edition: No. 30. Reporting period: as*

*at 21:00 Hrs.; 11th June 2014.* (Ministry of Health and Social Welfare, Republic of Liberia, 2014). at

<[http://mohsw.gov.lr/documents/Liberia%20Ebola%20Viral%20Disease-Sit%20Rep-%2030-%2011th%20June%202014.pdf%20docx%20\(1\).pdf](http://mohsw.gov.lr/documents/Liberia%20Ebola%20Viral%20Disease-Sit%20Rep-%2030-%2011th%20June%202014.pdf%20docx%20(1).pdf)>

48. *SITUATION REPORT EBOLA VIRUS DISEASE EPIDEMIC IN LIBERIA Edition: No. 31. Reporting time: as at*

*21:00 Hrs.; 12th June 2014.* (Ministry of Health and Social Welfare, Republic of Liberia, 2014). at

<[http://www.mohsw.gov.lr/documents/12juneLiberia%20Ebola%20Viral%20Disease-Sit%20Rep-%2031-%2012th%20June%202014%20pdf%20docx%20\(1\).pdf](http://www.mohsw.gov.lr/documents/12juneLiberia%20Ebola%20Viral%20Disease-Sit%20Rep-%2031-%2012th%20June%202014%20pdf%20docx%20(1).pdf)>

49. Ebola virus disease, West Africa – update 29 July 2014 - WHO | Regional Office for Africa. *WHO | Regional*

*Office for Africa* (2014). at <<http://www.afro.who.int/en/clusters-a-programmes/dpc/epidemic-a-pandemic-alert-and-response/outbreak-news/4236-ebola-virus-disease-west-africa-29-july-2014.html>>

50. WHO | Ebola situation in Port Harcourt, Nigeria. *WHO* (2014). at

<<http://www.who.int/mediacentre/news/ebola/3-september-2014/en/>>

51. WHO | Ebola virus disease update - Senegal. (2014). at <[http://www.who.int/csr/don/2014\\_08\\_30 Ebola/en/](http://www.who.int/csr/don/2014_08_30 Ebola/en/)>

Table S2: Model comparison

| Model name                     | Infection probability                                                                                                                                                                                                                                      | NLL   | AIC |
|--------------------------------|------------------------------------------------------------------------------------------------------------------------------------------------------------------------------------------------------------------------------------------------------------|-------|-----|
| Constant                       | $\beta_0$ (no network)                                                                                                                                                                                                                                     | 346.1 | 348 |
| Well-mixed                     | $\beta_0$                                                                                                                                                                                                                                                  | 350.7 | 353 |
| Diffusion                      | $\frac{1}{1 + e^{\beta_0 + \beta_1 d_{ij}}}$                                                                                                                                                                                                               | 281.9 | 353 |
| Diffusion + long distance      | $\frac{1}{1 + e^{\beta_0 + \beta_1 d_{ij}^{\beta_2}}}$                                                                                                                                                                                                     | 275.1 | 281 |
| Gravity                        | $\frac{1}{1 + e^{\beta_0 + \beta_1 \frac{d_{ij}}{(p_i p_j)^{\beta_2}}}}$                                                                                                                                                                                   | 273.2 | 279 |
| Gravity + long distance        | $\frac{1}{1 + e^{\beta_0 + \beta_1 \frac{d_{ij}^{\beta_2}}{(p_i p_j)^{\beta_3}}}}$                                                                                                                                                                         | 272.2 | 280 |
| Mobility (Senegal)             | $\frac{1}{1 + e^{\beta_0 + \beta_1 \text{mob}}}$                                                                                                                                                                                                           | 350.4 | 354 |
| Mobility (Senegal) + diffusion | $\frac{1}{1 + e^{\beta_0 + \beta_1 \text{mob} + \beta_2 d_{ij}}}$                                                                                                                                                                                          | 281.8 | 288 |
| Diffusion + country borders    | $\begin{cases} \beta_2 \frac{1}{1 + e^{\beta_0 + \beta_1 d_{ij}}} & \text{if crossing border} \\ \frac{1}{1 + e^{\beta_0 + \beta_1 d_{ij}}} & \text{if not crossing border} \end{cases}$                                                                   | 280.0 | 286 |
| Diffusion + core borders       | $\begin{cases} \beta_2 \frac{1}{1 + e^{\beta_0 + \beta_1 d_{ij}}} & \text{if crossing core border} \\ \frac{1}{1 + e^{\beta_0 + \beta_1 d_{ij}}} & \text{if not crossing core border} \end{cases}$                                                         | 274.9 | 281 |
| Gravity + country borders      | $\begin{cases} \beta_3 \frac{1}{1 + e^{\beta_0 + \beta_1 \frac{d_{ij}}{(p_i p_j)^{\beta_2}}}} & \text{if crossing border} \\ \frac{1}{1 + e^{\beta_0 + \beta_1 \frac{d_{ij}}{(p_i p_j)^{\beta_2}}}} & \text{if not crossing border} \end{cases}$           | 272.5 | 281 |
| Gravity + core borders         | $\begin{cases} \beta_3 \frac{1}{1 + e^{\beta_0 + \beta_1 \frac{d_{ij}}{(p_i p_j)^{\beta_2}}}} & \text{if crossing core border} \\ \frac{1}{1 + e^{\beta_0 + \beta_1 \frac{d_{ij}}{(p_i p_j)^{\beta_2}}}} & \text{if not crossing core border} \end{cases}$ | 270.0 | 278 |
| Radiation                      | $\frac{1}{1 + e^{\beta_0 + \beta_1 d_{ij} + \beta_2 \text{rad}}}$                                                                                                                                                                                          | 281.8 | 288 |

|                                   |                                                                                                                                                                                                   |       |     |
|-----------------------------------|---------------------------------------------------------------------------------------------------------------------------------------------------------------------------------------------------|-------|-----|
| Population weighted opportunity   | $\frac{1}{1 + e^{\beta_0 + \beta_1 d_{ij} + \beta_2 \text{pwo}}}$                                                                                                                                 | 281.9 | 288 |
| Force of infection (unnormalized) | $1 - e^{\left( \beta_0 p_i^{\beta_1} \sum_j \frac{p_j^{\beta_2}}{d_{ij}^{\beta_3}} \right)}$ (no network)                                                                                         | 275.4 | 283 |
| Force of infection (normalized)   | $1 - e^{\left( \frac{\beta_0 p_i^{\beta_1} \sum_j \frac{p_j^{\beta_2}}{d_{ij}^{\beta_3}}}{\left( \sum_{k \neq i} \frac{p_k^{\beta_2}}{d_{ik}^{\beta_3}} \right)^{\beta_4}} \right)}$ (no network) | 274.0 | 284 |

---

Table S3: Estimated parameter values

| Model name                     | Infection probability                                                              | $\beta_0$ | $\beta_1$ | $\beta_2$ | $\beta_3$ | $\beta_4$ |
|--------------------------------|------------------------------------------------------------------------------------|-----------|-----------|-----------|-----------|-----------|
| Constant                       | $\beta_0$ (no network)                                                             | 0.0010    |           |           |           |           |
| Well-mixed                     | $\beta_0$                                                                          | 0.00005   |           |           |           |           |
| Diffusion                      | $\frac{1}{1 + e^{\beta_0 + \beta_1 d_{ij}}}$                                       | 5.630     | 1.032     |           |           |           |
| Diffusion + long distance      | $\frac{1}{1 + e^{\beta_0 + \beta_1 d_{ij}^{\beta_2}}}$                             | 0.876     | 5.748     | 0.341     |           |           |
| Gravity                        | $\frac{1}{1 + e^{\beta_0 + \beta_1 \frac{d_{ij}}{(p_i p_j)^{\beta_2}}}}$           | 5.246     | 155.8     | 0.186     |           |           |
| Gravity + long distance        | $\frac{1}{1 + e^{\beta_0 + \beta_1 \frac{d_{ij}^{\beta_2}}{(p_i p_j)^{\beta_3}}}}$ | 3.659     | 22.63     | 0.593     | 0.080     |           |
| Mobility (Senegal)             | $\frac{1}{1 + e^{\beta_0 + \beta_1 \text{mob}}}$                                   | 9.886     | 0.000007  |           |           |           |
| Mobility (Senegal) + diffusion | $\frac{1}{1 + e^{\beta_0 + \beta_1 \text{mob} + \beta_2 d_{ij}}}$                  | 5.594     | 0.000003  | 1.046     |           |           |
| Diffusion + country borders    | $\beta_2 \frac{1}{1 + e^{\beta_0 + \beta_1 d_{ij}}}$ if crossing border            | 5.561     | 0.806     | 0.257     |           |           |
|                                | $\frac{1}{1 + e^{\beta_0 + \beta_1 d_{ij}}}$ if not crossing border                |           |           |           |           |           |
| Diffusion + core borders       | $\beta_2 \frac{1}{1 + e^{\beta_0 + \beta_1 d_{ij}}}$ if crossing core border       | 6.484     | 0.510     | 0.070     |           |           |
|                                | $\frac{1}{1 + e^{\beta_0 + \beta_1 d_{ij}}}$ if not crossing core border           |           |           |           |           |           |

| Model name                        | Infection probability                                                                                                                                                                                                                                            | $\beta_0$ | $\beta_1$ | $\beta_2$ | $\beta_3$ | $\beta_4$ |
|-----------------------------------|------------------------------------------------------------------------------------------------------------------------------------------------------------------------------------------------------------------------------------------------------------------|-----------|-----------|-----------|-----------|-----------|
| Gravity + country borders         | $\begin{cases} \frac{\beta_3}{1+e} \frac{1}{\beta_0+\beta_1 \frac{d_{ij}}{(p_i p_j)^{\beta_2}}} & \text{if crossing border} \\ \frac{1}{1+e} \frac{1}{\beta_0+\beta_1 \frac{d_{ij}}{(p_i p_j)^{\beta_2}}} & \text{if not crossing border} \end{cases}$           | 5.166     | 157.1     | 0.189     | 0.507     |           |
| Gravity + core borders            | $\begin{cases} \frac{\beta_3}{1+e} \frac{1}{\beta_0+\beta_1 \frac{d_{ij}}{(p_i p_j)^{\beta_2}}} & \text{if crossing core border} \\ \frac{1}{1+e} \frac{1}{\beta_0+\beta_1 \frac{d_{ij}}{(p_i p_j)^{\beta_2}}} & \text{if not crossing core border} \end{cases}$ | 5.792     | 105.7     | 0.186     | 0.150     |           |
| Radiation                         | $\frac{1}{1+e^{\beta_0+\beta_1 d_{ij}+\beta_2 \text{rad}}}$                                                                                                                                                                                                      | 5.588     | 1.046     | 0.000002  |           |           |
| Population weighted opportunity   | $\frac{1}{1+e^{\beta_0+\beta_1 d_{ij}+\beta_2 \text{pwo}}}$                                                                                                                                                                                                      | 5.606     | 1.041     | 0.0000006 |           |           |
| Force of infection (unnormalized) | $1 - e^{\left( \beta_0 p_i^{\beta_1} \sum_j \frac{p_j^{\beta_2}}{d_{ij}^{\beta_3}} \right)}$ (no network)                                                                                                                                                        | -12.14    | 0.544     | -1.267    | 2.399     |           |
| Force of infection (normalized)   | $1 - e^{\left( \frac{\beta_0 p_i^{\beta_1} \sum_j \frac{p_j^{\beta_2}}{d_{ij}^{\beta_3}}}{\left( \sum_{k \neq i} \frac{p_k^{\beta_2}}{d_{ik}^{\beta_3}} \right)^{\beta_4}} \right)}$ (no network)                                                                | -0.113    | 0.395     | -1.075    | 2.621     | 0.404     |

Table S4: Model parameter confidence ranges

| Model name                  | Infection probability                                                                                                                                                                                                  | $\Delta_0$   | $\Delta_1$ | $\Delta_2$ |
|-----------------------------|------------------------------------------------------------------------------------------------------------------------------------------------------------------------------------------------------------------------|--------------|------------|------------|
| Constant                    | $\beta_0$ (no network)                                                                                                                                                                                                 | 0.0000002    |            |            |
| Well-mixed                  | $\beta_0$                                                                                                                                                                                                              | 0.0000000004 |            |            |
| Diffusion                   | $\frac{1}{1 + e^{\beta_0 + \beta_1 d_{ij}}}$                                                                                                                                                                           | 1.079        | 0.502      |            |
| Diffusion + long distance   | $\frac{1}{1 + e^{\beta_0 + \beta_1 d_{ij}^{\beta_2}}}$                                                                                                                                                                 | 8.841        | 9.049      | 0.450      |
| Diffusion + country borders | $\left\{ \begin{array}{ll} \beta_2 \frac{1}{1 + e^{\beta_0 + \beta_1 d_{ij}}} & \text{if crossing border} \\ \frac{1}{1 + e^{\beta_0 + \beta_1 d_{ij}}} & \text{if not crossing border} \end{array} \right.$           | 0.669        | 0.411      | 0.397      |
| Diffusion + core borders    | $\left\{ \begin{array}{ll} \beta_2 \frac{1}{1 + e^{\beta_0 + \beta_1 d_{ij}}} & \text{if crossing core border} \\ \frac{1}{1 + e^{\beta_0 + \beta_1 d_{ij}}} & \text{if not crossing core border} \end{array} \right.$ | 6.484        | 0.432      | 0.146      |

$\Delta$  values represent the confidence interval on either side of the estimated  $\beta$  values (see Table S2).  
The remainder of the confidence intervals could not be estimated with this approach (see Methods).



Table S5A: Spearman correlation of selected transmission links

|                                 | Gravity +<br>core<br>borders | Gravity +<br>long<br>distance | Gravity | Gravity +<br>country<br>borders | Diffusion | Radiation |
|---------------------------------|------------------------------|-------------------------------|---------|---------------------------------|-----------|-----------|
| Gravity +<br>long<br>distance   | 0.968                        |                               |         |                                 |           |           |
| Gravity                         | 0.981                        | 0.991                         |         |                                 |           |           |
| Gravity +<br>country<br>borders | 0.982                        | 0.990                         | 0.999   |                                 |           |           |
| Diffusion                       | 0.852                        | 0.938                         | 0.886   | 0.883                           |           |           |
| Radiation                       | 0.852                        | 0.938                         | 0.886   | 0.883                           | 0.999     |           |
| Mobility<br>(Senegal)           | 0.974                        | 0.954                         | 0.984   | 0.985                           | 0.797     | 0.797     |

Table S5B: Pearson correlation of selected transmission links

|                                 | Gravity +<br>core<br>borders | Gravity +<br>long<br>distancel | Gravity | Gravity +<br>country<br>borders | Diffusion | Radiation |
|---------------------------------|------------------------------|--------------------------------|---------|---------------------------------|-----------|-----------|
| Gravity +<br>long<br>distancel  | 0.959                        |                                |         |                                 |           |           |
| Gravity                         | 0.983                        | 0.972                          |         |                                 |           |           |
| Gravity +<br>country<br>borders | 0.983                        | 0.973                          | 0.999   |                                 |           |           |
| Diffusion                       | 0.809                        | 0.908                          | 0.834   | 0.830                           |           |           |
| Radiation                       | 0.809                        | 0.908                          | 0.834   | 0.830                           | 0.999     |           |
| Mobility<br>(Senegal)           | 0.151                        | 0.188                          | 0.146   | 0.150                           | 0.135     | 0.133     |
